# Supplementary material for: Effects of folic acid and folic acid plus zinc supplements on the sperm characteristics and pregnancy outcomes of infertile men: A systematic review and meta-analysis
Source: PubMed Central journal article supplement — Heliyon. 2023 Jul 13;9(7):e18224. doi: 10.1016/j.heliyon.2023.e18224 (PMC10395467; doi:10.1016/j.heliyon.2023.e18224), 2023-07-13
Supplement: mmc1.pdf [file mmc1.pdf]



**TOPEDIT**

**TOPEDIT SCIENTIFIC EDITING**

**CERTIFICATE OF ENGLISH COPYEDITING**

This is to certify that the manuscript detailed below has been edited by multiple native English-speaking academic editors in TopEdit. Neither the research content nor the authors' intentions were altered in any way during the editing process. TopEdit guarantees the quality of English grammar, spelling, punctuation, syntax, technical accuracy, and consistency in this manuscript, provided that our editors' corrections and suggestions are accepted and further changes made by the authors are checked by our editors.

Manuscript title

Effects of folic acid and folic acid plus zinc supplementatio  
n on sperm characteristics in infertile men and its outcome  
in pregnancy: a systematic review and meta-analysis

Date Issued

04/25/2023

Certificate Number

CN 12312-01-0425-01

TopEdit specializes in comprehensive evaluation and academic editing of technical manuscripts, book chapters, grant proposals, and other types of scientific materials. Aiming at breaking language barriers and advancing research publication, we offer four levels of English editing: Proofreading, Copyediting, Line editing, and Developmental editing. Our editorial team comprises professional native English-speaking experts in various academic fields with advanced Ph.D. degrees.

[info@topeditsci.com](mailto:info@topeditsci.com)

<https://www.topeditsci.com>

<https://en.topeditsci.com/>
